# Supplementary material
Source: Springer Nature journal article supplement (https://www.springermedizin.de/resource/supplementary/13047_2008_6_MOESM3_ESM.pdf/9662974)

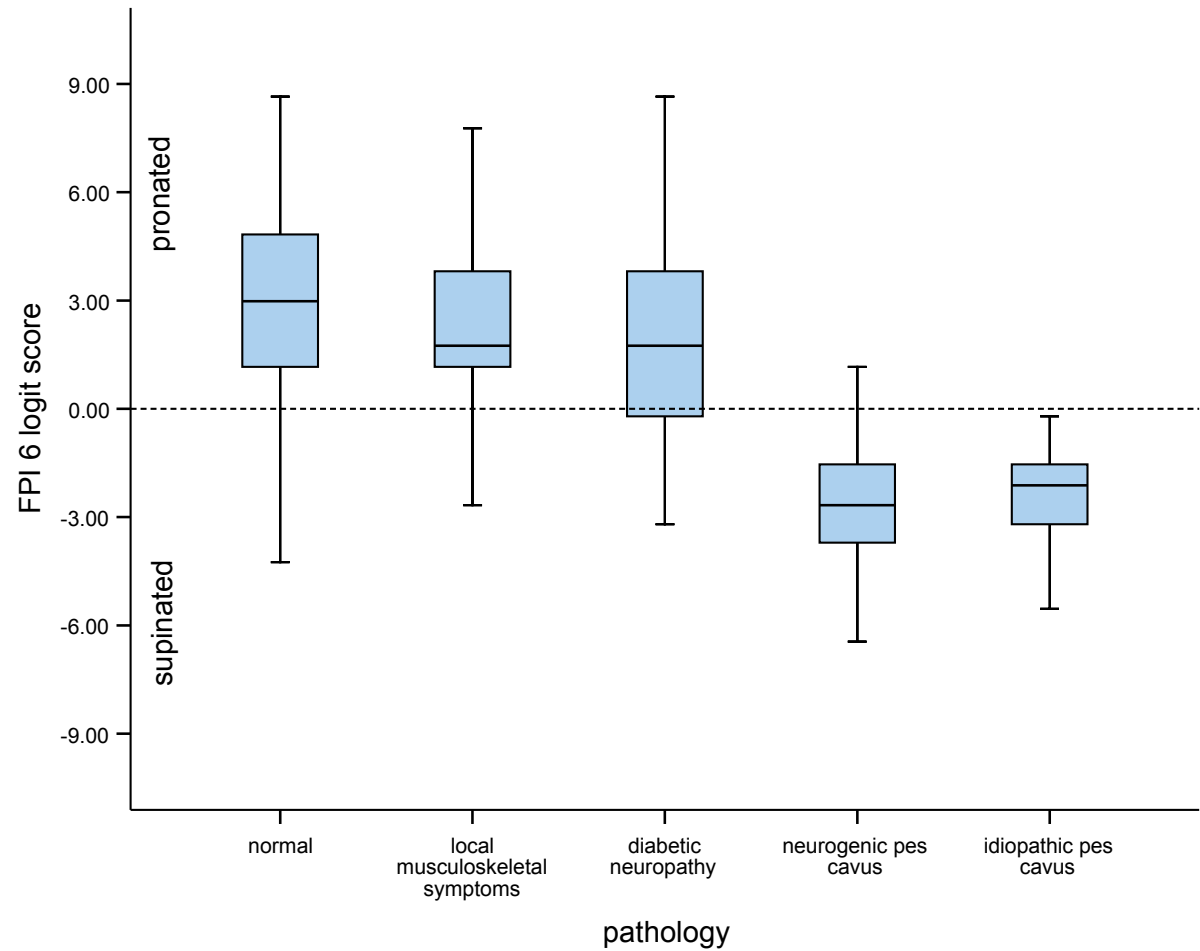

Supplement: MOESM3 [file 9662974]
